# Supplementary material
Source: Research Square preprint supplement (doi:10.21203/rs.3.rs-9545922/v1)
Supplement: Supplementary file 1 [file 87e600bb5b0b50441d71ea08.docx]

**Supplementary Table 1** Demographic characteristics and tumor features for the patients included in the survival analysis for clinical outcomes among different histological subtypes.

Abbreviations: AC = Adenocarcinoma; CEA = Carcinoembryonic antigen; MA = Mucinous adenocarcinoma; NH = Non-Hispanic; SRCC = Signet ring cell carcinoma

|  | **AC**  (n=54,438; 90.7%) | **MA**  (n=4,550; 7.6%) | **SRCC**  (n=1,002; 1.7%) | p-value |
| --- | --- | --- | --- | --- |
| **Demographic Characteristics** | | | | |
| Age, median (IQR) | 44.0 (40.0, 47.0) | 43.0 (38.0, 47.0) | 41.0 (33.0, 46.0) | **< 0.001** |
| Sex, n (%) |  |  |  | **< 0.001** |
| Male | 29216 (53.7%) | 2690 (59.1%) | 619 (61.8%) |  |
| Female | 25222 (46.3%) | 1860 (40.9%) | 383 (38.2%) |  |
| Race, n (%) |  |  |  | **< 0.001** |
| NH Whites | 30873 (57.1%) | 2426 (53.4%) | 510 (51.1%) |  |
| NH Blacks | 7181 (13.3%) | 645 (14.2%) | 125 (12.5%) |  |
| NH American Indian/Alaska Native | 590 (1.1%) | 38 (0.8%) | 9 (0.9%) |  |
| NH Asian or Pacific Islander | 5595 (10.3%) | 443 (9.8%) | 139 (13.9%) |  |
| Hispanic (all races) | 9838 (18.2%) | 987 (21.7%) | 215 (21.5%) |  |
| **Tumor Features** | | | | |
| Pretreatment CEA, n (%) |  |  |  | **0.003** |
| Positive | 11224 (50.6%) | 641 (45.8%) | 168 (48.3%) |  |
| Negative | 10942 (49.4%) | 758 (54.2%) | 180 (51.7%) |  |
| Tumor size, median (IQR) | 46.0 (32.0, 60.0) | 60.0 (42.0, 77.0) | 60.0 (45.0, 80.0) | **< 0.001** |
| Tumor site, n (%) |  |  |  | **< 0.001** |
| Right colon | 12283 (23.1%) | 1965 (44.9%) | 358 (37.5%) |  |
| Left colon | 18447 (34.7%) | 1178 (26.9%) | 257 (26.9%) |  |
| Rectum | 22402 (42.2%) | 1229 (28.1%) | 340 (35.6%) |  |
| Stage at Diagnosis, n (%) |  |  |  | **< 0.001** |
| Local | 15356 (28.8%) | 767 (17.0%) | 52 (5.3%) |  |
| Regional | 22781 (42.7%) | 2315 (51.4%) | 436 (44.7%) |  |
| Distant | 15246 (28.6%) | 1426 (31.6%) | 487 (49.9%) |  |
| Nodal involvement at diagnosis, n (%) | 23782 (43.7%) | 2267 (49.8%) | 619 (61.8%) | **< 0.001** |
| Distant metastases at diagnosis, n (%) | 14594 (26.8%) | 1316 (28.9%) | 462 (46.1%) | **< 0.001** |
| Pathological grade, n (%) |  |  |  | **< 0.001** |
| Well differentiated | 3608 (8.1%) | 394 (10.2%) | 6 (0.8%) |  |
| Moderately differentiated | 32691 (73.6%) | 2484 (64.5%) | 32 (4.2%) |  |
| Poorly differentiated | 7410 (16.7%) | 862 (22.4%) | 627 (82.0%) |  |
| Undifferentiated | 731 (1.6%) | 112 (2.9%) | 100 (13.1%) |  |

**Supplementary Table 2** Demographic characteristics and tumor features for the patients with early-onset colorectal cancer among propensity-matched cohorts for adenocarcinoma and signet ring cell carcinoma

Abbreviations: AC = Adenocarcinoma; CEA = Carcinoembryonic antigen; MA = Mucinous adenocarcinoma; NH = Non-Hispanic; SRCC = Signet ring cell carcinoma

|  | **AC** (n=248) | **SRCC** (n=248) |
| --- | --- | --- |
| **Demographic characteristics** | | |
| Age, median (IQR) | 41.0 (35.0, 46.0) | 41.0 (32.75, 46.0) |
| Sex, n (%) |  |  |
| Male | 147 (59.3%) | 161 (64.9%) |
| Female | 101 (40.7%) | 87 (35.1%) |
| Race, n (%) |  |  |
| NH Whites | 102 (41.1%) | 118 (47.6%) |
| NH Blacks | 30 (12.1%) | 24 (9.7%) |
| NH American Indian/Alaska Native | 1 (0.4%) | 0 (0.0%) |
| NH Asian or Pacific Islander | 31 (12.5%) | 40 (16.1%) |
| Hispanic (all races) | 84 (33.9%) | 66 (26.6%) |
| **Tumor Features** | | |
| Pretreatment CEA, n (%) |  |  |
| Negative | 144 (58.1%) | 128 (51.6%) |
| Positive | 104 (41.9%) | 120 (48.4%) |
| Tumor size (mm), median (IQR) | 60.0 (44.0, 85.0) | 60.0 (47.0, 75.0) |
| Tumor site, n (%) |  |  |
| Right colon | 87 (35.1%) | 98 (39.5%) |
| Left colon | 85 (34.3%) | 70 (28.2%) |
| Rectum | 76 (30.6%) | 80 (32.3%) |
| Stage at Diagnosis, n (%) |  |  |
| Local | 21 (8.5%) | 13 (5.2%) |
| Regional | 151 (60.9%) | 138 (55.6%) |
| Distant | 76 (30.6%) | 97 (39.1%) |
| Nodal involvement at diagnosis, n (%) | 180 (72.6%) | 192 (77.4%) |
| Distant metastases at diagnosis, n (%) | 67 (27.0%) | 90 (36.3%) |
